# Supplementary material
Source: PubMed Central journal article supplement (PMC10527432)
Supplement: NIHMS1910415-supplement-1.pdf [file NIHMS1910415-supplement-1.pdf]

**Supplemental information**

**Development of an  $\alpha$ -synuclein positron emission  
tomography tracer for imaging synucleinopathies**

**Jie Xiang, Youqi Tao, Yiyuan Xia, Shilin Luo, Qinyue Zhao, Bowei Li, Xiaoqian Zhang, Yunpeng Sun, Wencheng Xia, Mingming Zhang, Seong Su Kang, Eun-Hee Ahn, Xia Liu, Fang Xie, Yihui Guan, Jenny J. Yang, Lihong Bu, Shengxi Wu, Xiaochuan Wang, Xuebing Cao, Cong Liu, Zhentao Zhang, Dan Li, and Keqiang Ye**

**Table S1: Candidate compound information, related to Figure 1.**

| No.                            | Compound | Structure | No. | Compound | Structure |
|--------------------------------|----------|-----------|-----|----------|-----------|
| <b>A. Commercial compounds</b> |          |           |     |          |           |
| 1                              | Z644     |           | 13  | 96-9     |           |
| 2                              | Z213     |           | 14  | 54-4     |           |
| 3                              | Z922     |           | 15  | 83-4     |           |
| 4                              | Z584     |           | 16  | 77-4     |           |
| 5                              | Z864     |           | 17  | 01-7     |           |
| 6                              | Z987     |           | 18  | 61-8     |           |
| 7                              | Z257     |           | 19  | 19-1     |           |
| 8                              | Z427     |           | 20  | 80-3     |           |
| 9                              | Z819     |           | 21  | 83-4     |           |
| 10                             | Z876     |           | 22  | 34-5     |           |
| 11                             | Z398     |           | 23  | 68-7     |           |

---

**B, Derivatives**

---

1 EU01-01A

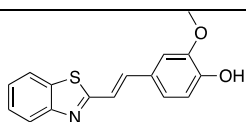

12 EU04-03B

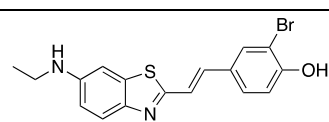

2 EU01-01B

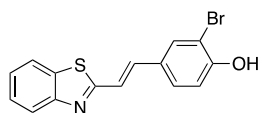

13 EU05-01A

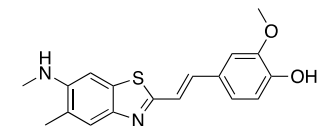

3 EU02-01A

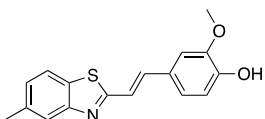

14 EU05-01B

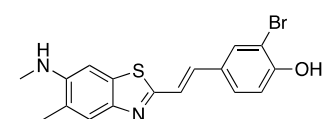

4 EU02-01B

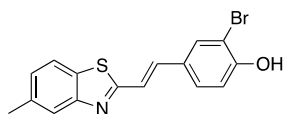

15 EU05-02A

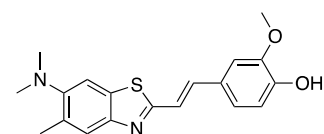

5 EU03-01A

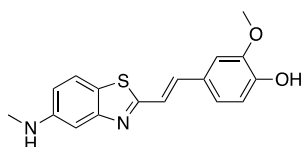

16 EU05-02B

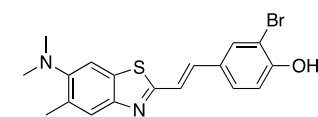

6 EU03-01B

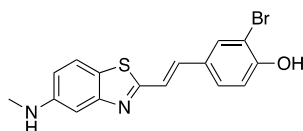

17 EU05-03A

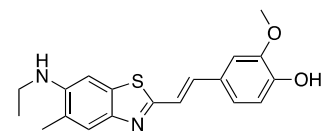

7 EU04-01A

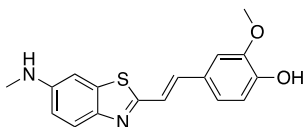

18 EU05-03B

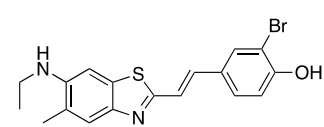

8 EU04-01B

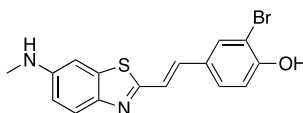

19 Compound 1

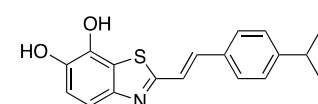

9 EU04-02A

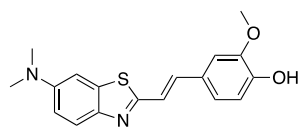

20 WT17008-001A

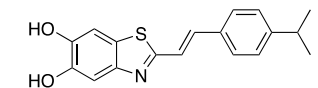

10 EU04-02B

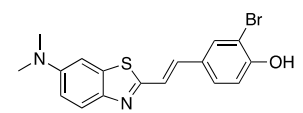

21 WT17008-001B

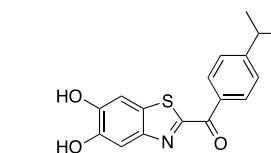

11 EU04-03A

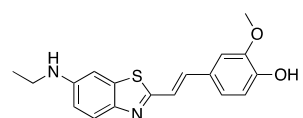

**Table S2: Plasma and brain concentrations and B/P ratio of F0502B in male ICR mice (i.v. injected with 5 mg/kg F0502B), related to Figure 2.**

| <b>Plasma Concentrations (ng/mL) of F0502B in Male ICR Mouse After 5 mg/kg i.v. Dosed</b> |               |               |             |              |                           |                   |
|-------------------------------------------------------------------------------------------|---------------|---------------|-------------|--------------|---------------------------|-------------------|
| Time Point (min) Concentrations (Mean ± SD)                                               |               |               |             |              | T <sub>1/2</sub><br>(min) | CL<br>(mL/min/kg) |
| 1                                                                                         | 5             | 15            | 30          | 60           |                           |                   |
| 30396 ± 1290                                                                              | 4267 ± 507    | 1009 ± 47     | 324 ± 62    | 128 ± 22     | 6.9                       | 33.6              |
| <b>Brain Concentrations (ng/g) of F0502B in Male ICR Mouse After 5 mg/kg i.v. Dosed</b>   |               |               |             |              |                           |                   |
| Time Point (min) Concentrations (Mean ± SD)                                               |               |               |             |              | T <sub>1/2</sub><br>(min) | CL<br>(g/min/kg)  |
| 1                                                                                         | 5             | 15            | 30          | 60           |                           |                   |
| 3220 ± 88                                                                                 | 3820 ± 526    | 2734 ±<br>349 | 2314 ± 198  | 1205 ±<br>83 | 35.8                      | 24.1              |
| <b>B/P Ratio of F0502B in Male ICR Mouse After 5 mg/kg i.v. Dosed</b>                     |               |               |             |              |                           |                   |
| Time Point (h) Concentrations (Mean ± SD)                                                 |               |               |             |              |                           |                   |
| 1                                                                                         | 5             | 15            | 30          | 60           |                           |                   |
| 0.106 ± 0.006                                                                             | 0.894 ± 0.020 | 2.72 ± 0.44   | 7.32 ± 1.66 | 13.37 ± 2.64 |                           |                   |

**Table S3: Complete cell count and liver/renal function test of C57BL/6 mice (i.v. injected with 1 mg/kg F0502B (10 folds of the dose in radioactive PET study), n = 3 mice per group), related to Figure 7.**

| <b>Parameter</b>                   | <b>Mean</b> | <b>SD</b> | <b>Unit</b>         | <b>Reference values</b> |
|------------------------------------|-------------|-----------|---------------------|-------------------------|
| Total white blood cell count (WBC) | 5.20        | 0.44      | 10 <sup>9</sup> /L  | 0.8-6.8                 |
| Lymphocytes count                  | 3.43        | 0.47      | 10 <sup>9</sup> /L  | 0.7-5.7                 |
| Monocytes count                    | 0.30        | 0.10      | 10 <sup>9</sup> /L  | 0.0-0.3                 |
| Neutrophils count                  | 1.47        | 0.42      | 10 <sup>9</sup> /L  | 0.5-3.8                 |
| mean corpuscular volume (MCV)      | 53.53       | 0.49      | fL                  | 48.2-58.3               |
| red blood cell (RBC) count         | 8.63        | 0.23      | 10 <sup>12</sup> /L | 6.36-12.42              |
| hemoglobin concentration (HGB)     | 135.00      | 2.00      | g/L                 | 110-162                 |
| plateletcrit (PLT)                 | 911.00      | 122.10    | 10 <sup>9</sup> /L  | 450-1590                |
| alanine transaminase (ALT)         | 52.79       | 17.98     | U/L                 | 10.06-96.47             |
| aspartate transaminase (AST)       | 135.84      | 16.76     | U/L                 | 36.31-235.48            |
| total bilirubin (TBIL)             | 11.47       | 0.75      | umol/l              | 0.45-33.89              |
| blood urea nitrogen (BUN)          | 21.75       | 1.09      | mg/dl               | 10.81-34.74             |
| creatinine (CR)                    | 15.69       | 0.45      | umol/l              | 10.91-85.09             |
| uric acid (UA)                     | 54.54       | 2.37      | umol/l              | 44.42-224.77            |

**Table S4. Statistics of cryo-EM data collection, refinement and validation, related to Figure 5, 6.**

| Name                                       | $\alpha$ -Syn fibril-F0502B complex | Apo- $\alpha$ -Syn fibril |
|--------------------------------------------|-------------------------------------|---------------------------|
| PDB ID                                     | 7WMM                                | -                         |
| EMDB ID                                    | EMD-32615                           | -                         |
| <b>Data Collection</b>                     |                                     |                           |
| Camera                                     | BioContinuum K3                     | BioContinuum K3           |
| Microscope                                 | Krios G4                            | Krios G4                  |
| Magnification                              | 105,000                             | 105,000                   |
| Voltage (kV)                               | 300                                 | 300                       |
| Defocus Range ( $\mu\text{m}$ )            | -1.6 to -2.2                        | -1.6 to -2.2              |
| Pixel size ( $\text{\AA}$ )                | 0.83                                | 0.83                      |
| Exposure time (s/frame)                    | 0.05                                | 0.05                      |
| Number of frames                           | 40                                  | 40                        |
| Total dose ( $\text{e}^-/\text{\AA}^2$ )   | 60                                  | 60                        |
| <b>Reconstruction</b>                      |                                     |                           |
| Micrographs                                | 2,567                               | 2,868                     |
| Manually picked fibrils                    | 12,0504                             | 29,120                    |
| Box size (pixel)                           | 360                                 | 360                       |
| Inter-box distance ( $\text{\AA}$ )        | 29.88                               | 29.88                     |
| Segments extracted                         | 742,177                             | 617,969                   |
| Segments after Class2D                     | 155,475                             | 116,827                   |
| Segments after Class3D                     | 46,861                              | 42,079                    |
| Resolution ( $\text{\AA}$ )                | 2.6                                 | 2.8                       |
| Map sharpening B-factor ( $\text{\AA}^2$ ) | -74.94                              | -87.79                    |
| Half pitch (nm)                            | 113.2                               | 106.3                     |
| Helical rise ( $\text{\AA}$ )              | 2.41                                | 2.42                      |
| Helical twist ( $^\circ$ )                 | 179.62                              | 179.59                    |
| <b>Atomic model</b>                        |                                     |                           |
| Non-hydrogen atoms                         | 2,618                               | -                         |

---

|                                        |                  |   |
|----------------------------------------|------------------|---|
| Protein residues                       | 366              | - |
| Ligands                                | 2                | - |
| Protein B-factors ( $\text{\AA}^2$ )   | 28-110 (avr. 50) | - |
| Ligand B-factors ( $\text{\AA}^2$ )    | 77               | - |
| r.m.s.d. Bond lengths ( $\text{\AA}$ ) | 0.004            | - |
| r.m.s.d. Bond angles ( $^\circ$ )      | 0.632            | - |
| All-atom clash score                   | 4.68             | - |
| MolProbity score                       | 1.70             | - |
| Rotamer outliers                       | 0.00%            | - |
| Ramachandran Outliers                  | 0.00%            | - |
| Ramachandran Allowed                   | 7.34%            | - |
| Ramachandran Favored                   | 92.66%           | - |

---

**Table S5: F0502B crystal structure information, related to Figure 5, STAR**

**Methods.**



| Compound                                            | F0502B                                                                             |
|-----------------------------------------------------|------------------------------------------------------------------------------------|
| Formula                                             | C <sub>21</sub> H <sub>22</sub> BrFN <sub>2</sub> O <sub>2</sub> S                 |
| Structure                                           | 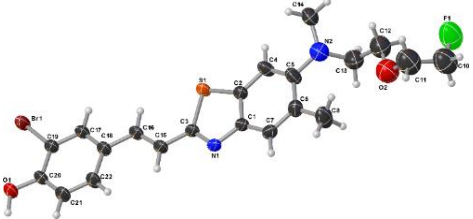 |
| <i>D</i> <sub>calc</sub> /g cm <sup>-3</sup>        | 1.477                                                                              |
| $\mu$ /mm <sup>-1</sup>                             | 3.846                                                                              |
| Formula Weight                                      | 465.52                                                                             |
| Color                                               | yellow                                                                             |
| Shape                                               | plate                                                                              |
| Size/mm <sup>3</sup>                                | 0.45×0.20×0.05                                                                     |
| <i>T</i> /K                                         | 101(2)                                                                             |
| Crystal System                                      | monoclinic                                                                         |
| Space Group                                         | <i>P</i> 2 <sub>1</sub> / <i>n</i>                                                 |
| <i>a</i> /Å                                         | 16.2164(4)                                                                         |
| <i>b</i> /Å                                         | 14.8387(3)                                                                         |
| <i>c</i> /Å                                         | 19.1152(5)                                                                         |
| $\alpha$ /°                                         | 90                                                                                 |
| $\beta$ /°                                          | 114.474(3)                                                                         |
| $\gamma$ /°                                         | 90                                                                                 |
| <i>V</i> /Å <sup>3</sup>                            | 4186.4(2)                                                                          |
| <i>Z</i>                                            | 8                                                                                  |
| <i>Z</i> '                                          | 2                                                                                  |
| Wavelength/Å                                        | 1.54184                                                                            |
| Radiation type                                      | CuK $\alpha$                                                                       |
| $\theta_{min}$ /°                                   | 3.019                                                                              |
| $\theta_{max}$ /°                                   | 68.249                                                                             |
| Measured Refl.                                      | 37434                                                                              |
| Independent Refl.                                   | 7618                                                                               |
| Reflections with <i>I</i> > 2 $\sigma$ ( <i>I</i> ) | 6457                                                                               |
| <i>R</i> <sub>int</sub>                             | 0.0541                                                                             |

---

|                   |        |
|-------------------|--------|
| Parameters        | 563    |
| Restraints        | 517    |
| Largest Peak      | 1.331  |
| Deepest Hole      | -1.304 |
| GooF              | 1.062  |
| $wR_2$ (all data) | 0.2230 |
| $wR_2$            | 0.2146 |
| $R_1$ (all data)  | 0.0848 |
| $R_1$             | 0.0760 |

---

**Table S6: Human tissue information, related to STAR methods.**

| <b>CASE NO.</b> | <b>PRIMARY NEUROPATHOLOGIC DIAGNOSIS</b> | <b>SECONDARY NEUROPATHOLOGIC DIAGNOSIS</b> | <b>AGE AT DEATH/BX</b> | <b>SEX</b> | <b>BRAIN REGIONS</b> |
|-----------------|------------------------------------------|--------------------------------------------|------------------------|------------|----------------------|
| 1               | Control                                  |                                            | 65                     | m          | cortex               |
| 2               | Control                                  |                                            | 70                     | m          | cortex               |
| 3               | Control                                  | Infarcts-hemorrhagic                       | 69                     | m          | cortex               |
| 4               | Control                                  | Microinfarct                               | 61                     | m          | cortex               |
| 5               | Control                                  |                                            | 59                     | m          | cortex               |
| 6               | Control                                  | Microinfarct-Hp                            | 94                     | m          | cortex               |
| 7               | Control                                  |                                            | 87                     | m          | midbrain, amygdala   |
| 8               | Control                                  |                                            | 74                     | m          | midbrain, amygdala   |
| 9               | Control                                  |                                            | 89                     | m          | midbrain, amygdala   |
| 10              | AD                                       |                                            | 72                     | m          | cortex               |
| 11              | AD                                       |                                            | 68                     | m          | cortex               |
| 12              | AD                                       |                                            | 85                     | m          | midbrain, amygdala   |
| 13              | AD                                       |                                            | 77                     | m          | midbrain, amygdala   |
| 14              | AD                                       |                                            | 85                     | m          | midbrain, amygdala   |
| 15              | DLB-limbic                               | Status PostPallidotomy                     | 74                     | m          | cortex               |
| 16              | DLB-limbic                               |                                            | 67                     | m          | cortex               |
| 17              | DLB-limbic                               |                                            | 72                     | m          | cortex               |
| 18              | DLB-limbic                               | TDP-43 incl-Hp, Ent                        | 97                     | f          | cortex               |
| 19              | DLB-neocortical                          | Status Post Gamma-Knife Radiosurgery       | 69                     | m          | cortex               |
| 20              | DLB-neocortical                          | Status Post Pallidotomy                    | 59                     | m          | cortex               |
| 21              | DLB-neocortical                          | Status postpallidotomy                     | 78                     | m          | cortex               |
| 22              | DLB-neocortical                          |                                            | 64                     | m          | cortex               |
| 23              | DLB-neocortical                          |                                            | 64                     | m          | cortex               |
| 24              | DLB-neocortical                          | Marked loss of neurons in CA3              | 68                     | m          | cortex, midbrain     |
| 25              | DLB-neocortical                          | Braak III                                  | 75                     | m          | cortex, midbrain     |
| 26              | DLB-neocortical                          |                                            | 72                     | f          | cortex, midbrain     |
| 27              | PD                                       |                                            | 83                     | m          | midbrain, amygdala   |
| 28              | PD                                       |                                            | 74                     | m          | midbrain, amygdala   |
| 29              | PD                                       |                                            | 85                     | m          | midbrain, amygdala   |
| 30              | PD-neocortical                           | Hemorrhage-pons                            | 86                     | f          | cortex               |
| 31              | PD-neocortical                           | Status postpallidotomy                     | 78                     | f          | cortex               |
| 32              | PD-neocortical                           |                                            | 64                     | f          | cortex               |
| 33              | MSA(SND)                                 |                                            | 78                     | m          | SN                   |
| 34              | MSA(SND)                                 |                                            | 68                     | m          | SN                   |
| 35              | MSA (Corticonigral)                      | Lobar Atrophy w/o Pick Bodies              | 69                     | m          | SN                   |
| 36              | MSA (SND and OPCA)                       |                                            | 72                     | f          | SN                   |
| 37              | MSA (SND and OPCA)                       | Sclerosis - Hp                             | 75                     | m          | SN                   |
