# Supplementary material
Source: PubMed Central journal article supplement (PMC10527432)
Supplement: NIHMS1910415-supplement-2.pdf [file NIHMS1910415-supplement-2.pdf]

**Data S1. Synthetic routes for chemicals, related to Figure 1, 5, 7.**

**A.) Synthetic routes for EU0201A and EU0201B.**

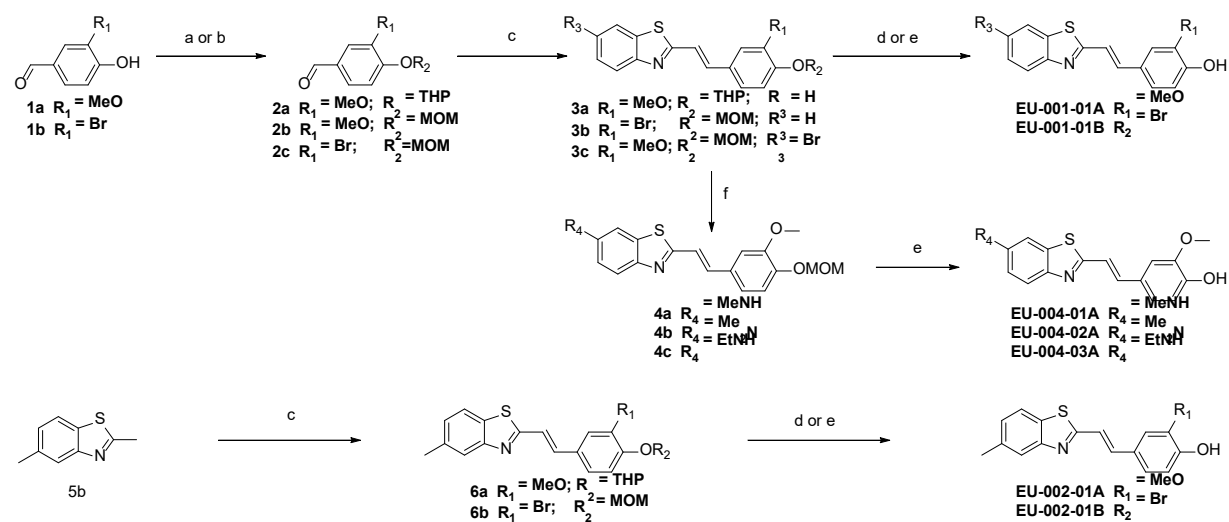

Reagent and conditions: (a) (for **2a**) DHP, PPTs, THF, reflux; (b) (for **2b** and **2c**) MOMBr, TEA,  $\text{CH}_2\text{Cl}_2$ , rt; (c) benzothiazole, NaH, THF, rt; (d) TsOH, MeOH, rt; (e) TFA,  $\text{CH}_2\text{Cl}_2$ , 0 °C then rt; (f)  $\text{EtNH}_2$ ,  $\text{Pd}_2(\text{dba})_3$ , XantPhos,  $\text{Cs}_2\text{CO}_3$ , dioxane, 90 °C.

**B.) Synthetic routes for EU0201A and EU0201B.**

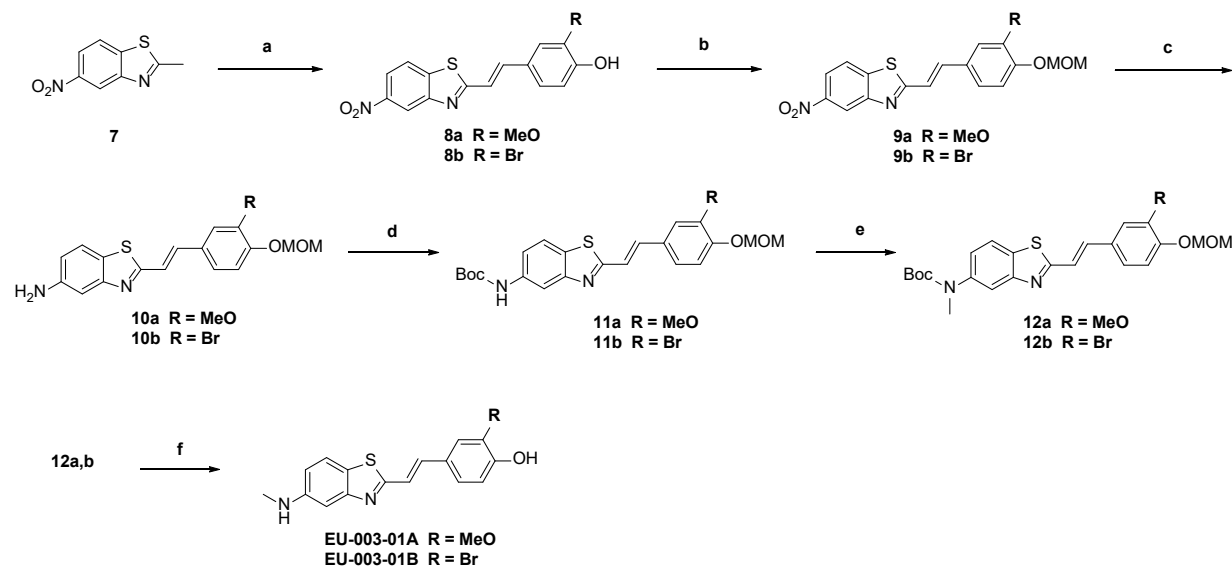

Reagents and conditions: (a) 2-bromo-4-methylphenol,  $\text{H}_2\text{SO}_4$ , dioxane, 100 °C; (b) MOMBr, TEA,  $\text{CH}_2\text{Cl}_2$ , rt; (c) Zn,  $\text{NH}_4\text{Cl}$ , MeOH, rt; (d)  $\text{Boc}_2\text{O}$ , 80 °C; (e) MeI, NaH, DMF, rt; (f) TFA,  $\text{CH}_2\text{Cl}_2$ , rt.

C.) Synthetic routes for EU0401B, EU0403B, EU0503A, EU0503B, EU0501A,

EU0501B.

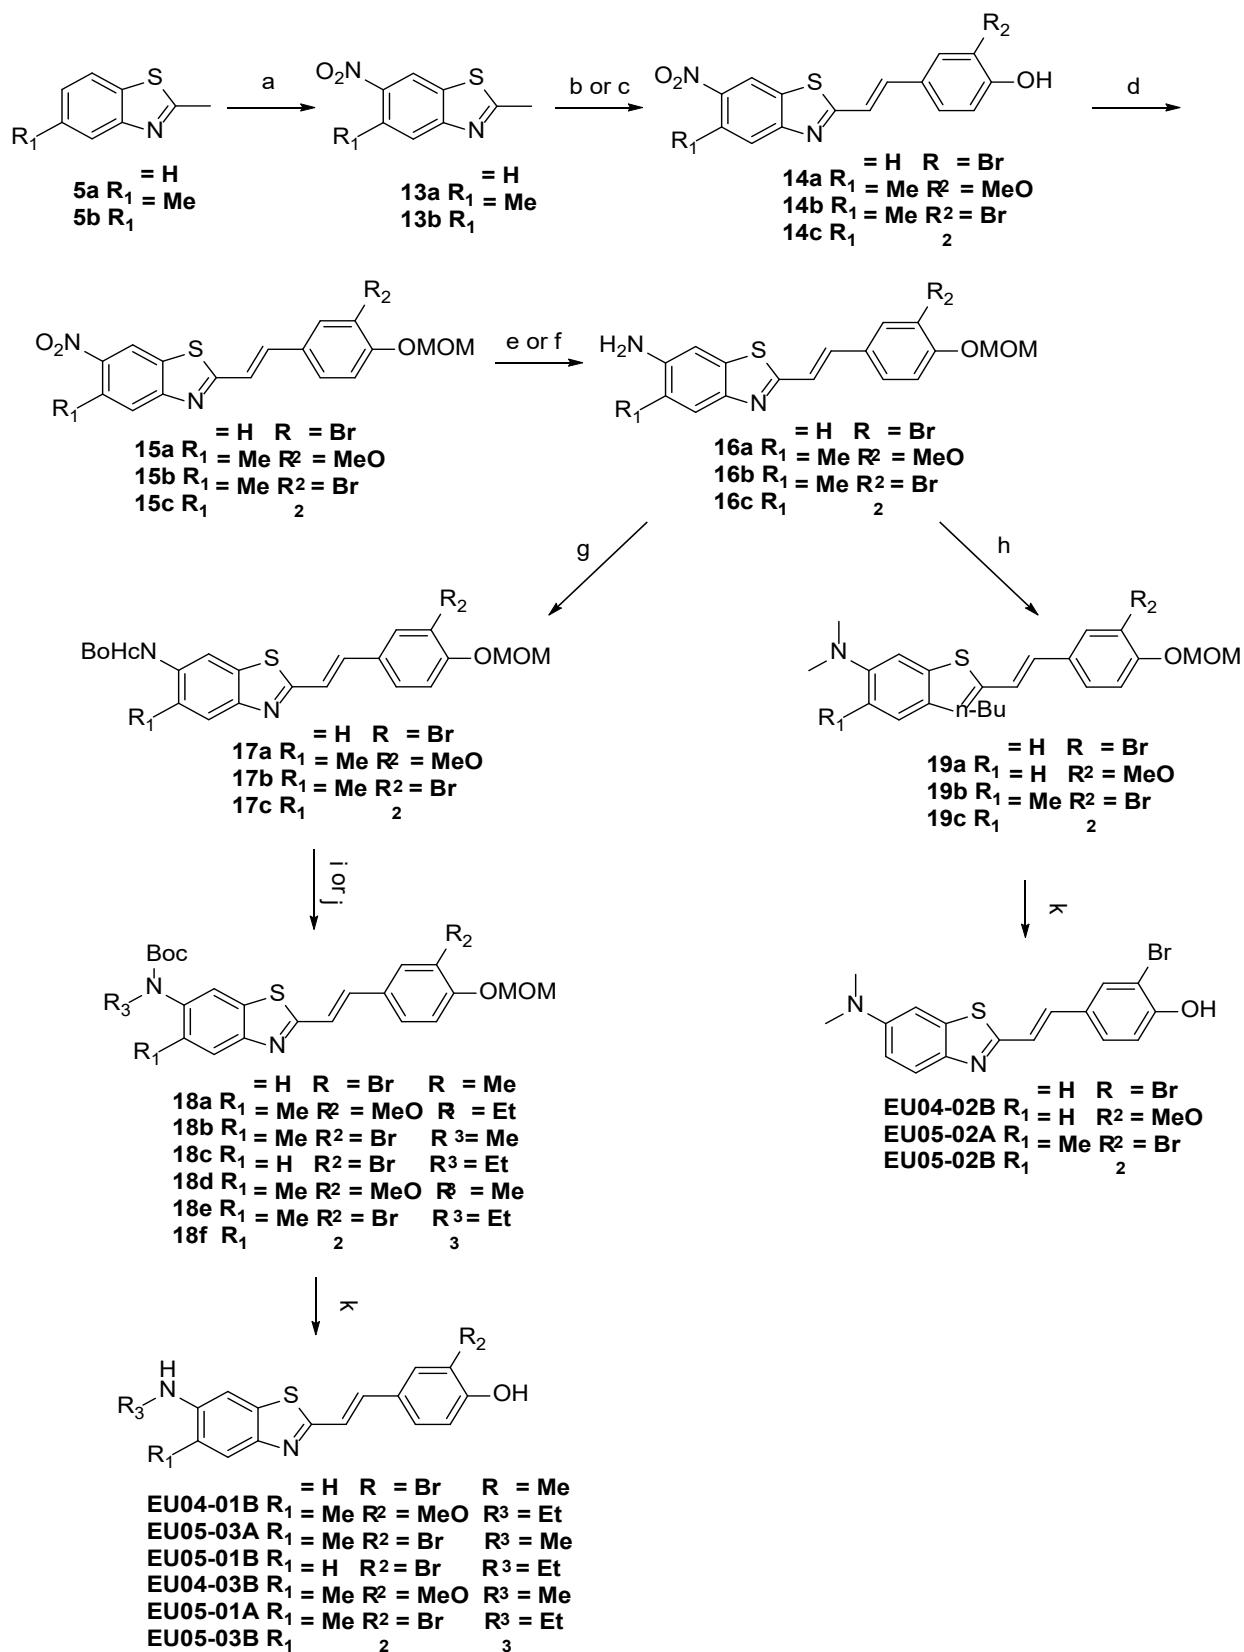

Reagent and conditions: (a) HNO<sub>3</sub>, H<sub>2</sub>SO<sub>4</sub>, 0 °C-rt; (b) (for **14a,c**) H<sub>2</sub>SO<sub>4</sub>, dioxane, **1b**, rt; (c) (for **14b**) H<sub>2</sub>SO<sub>4</sub>, dioxane, **1a**, rt; (d) MOMBr, TEA, DCM, rt; (e) (for **16a** and **16b**) Zn, NH<sub>4</sub>Cl, EtOH, rt; (f) (for **16c**) Zn, NH<sub>4</sub>Cl, MeOH, rt; (g) Boc<sub>2</sub>O, 60 °C; (h) aq. HCHO, NaBH<sub>3</sub>CN, 0 °C; (i) (for **18a**, **18c** and **18e**) MeI, NaH, 0 °C; (j) (for **18b**, **18d** and **18f**) EtI, NaH, 0 °C; (k) TFA, 0 °C.

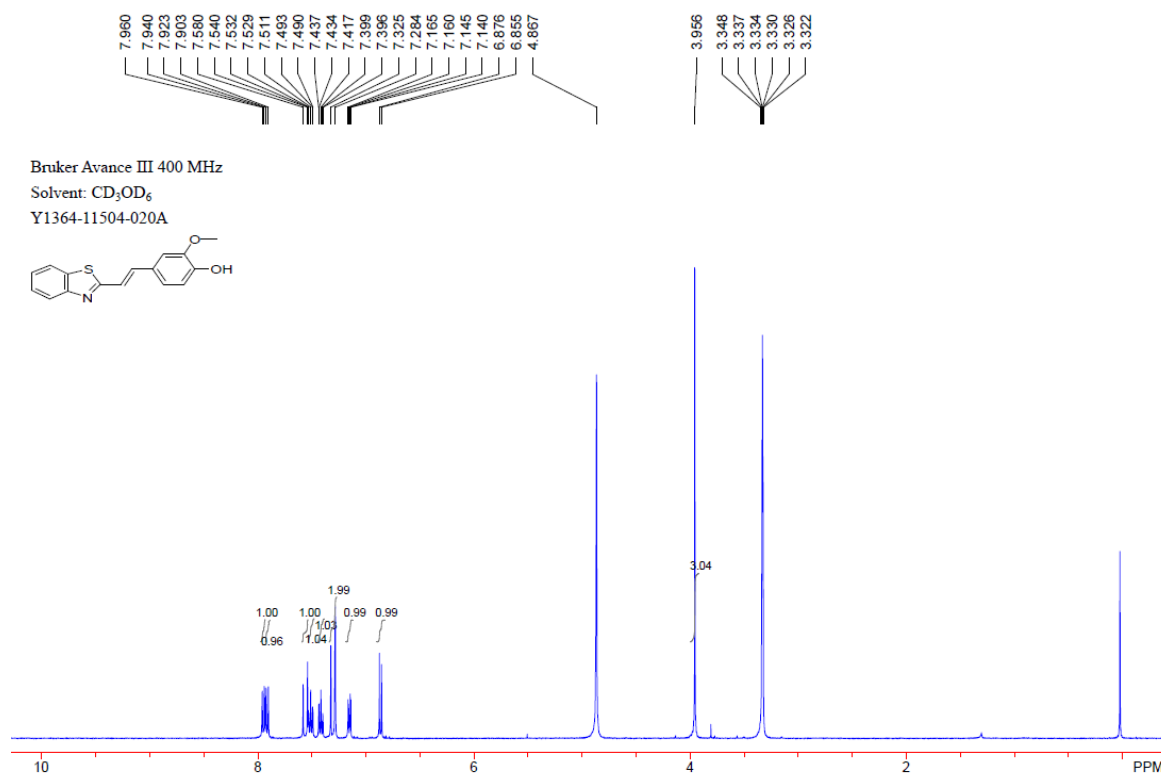

<sup>1</sup>H NMR spectrum of EU01-01A

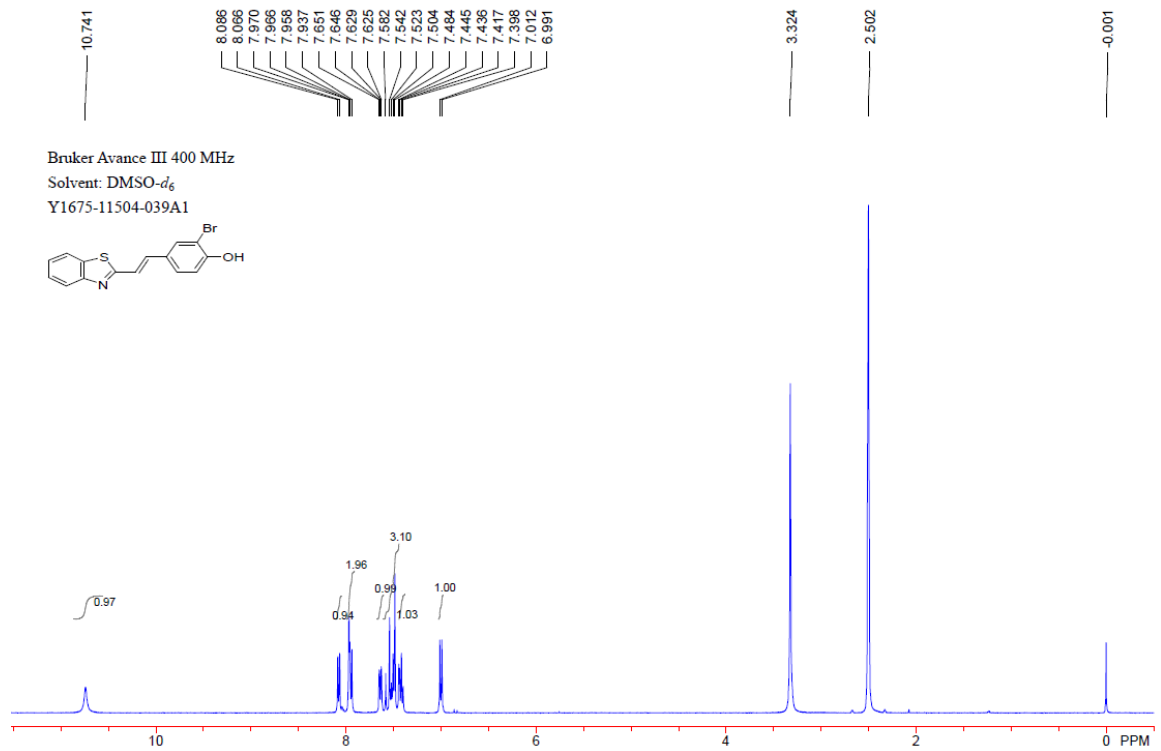

<sup>1</sup>H NMR spectrum of EU01-01B

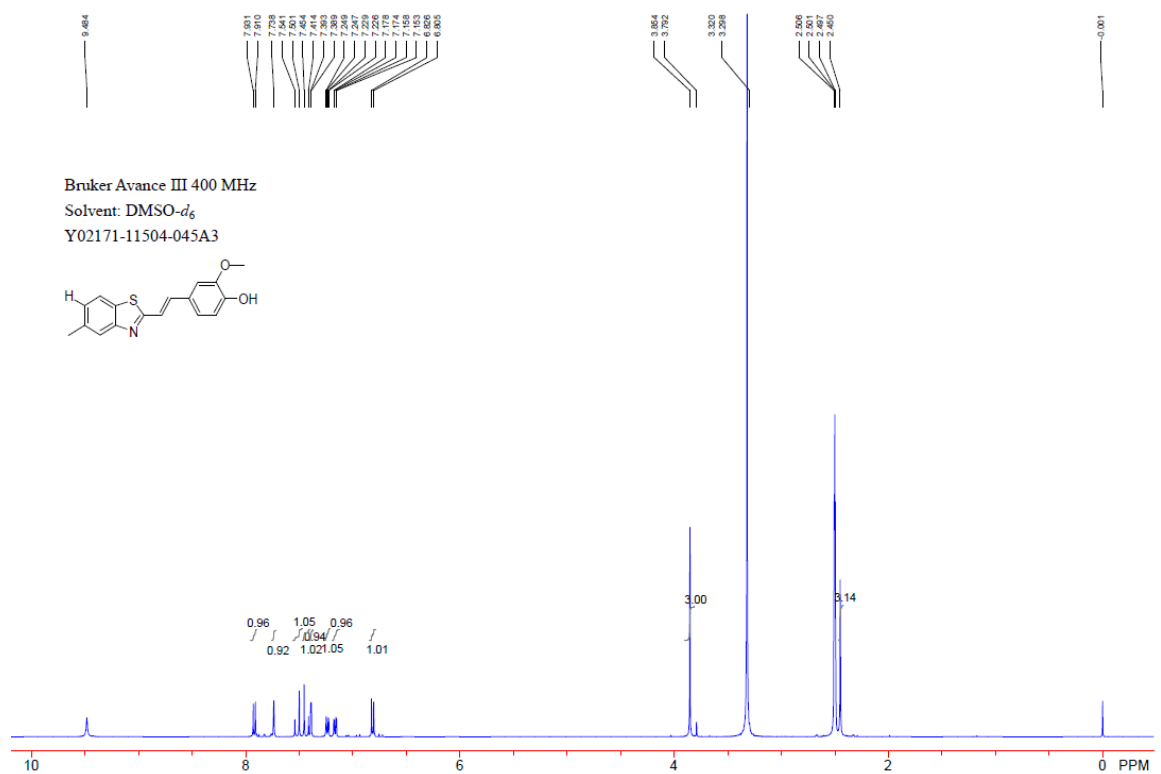

<sup>1</sup>H NMR spectrum of EU02-01A

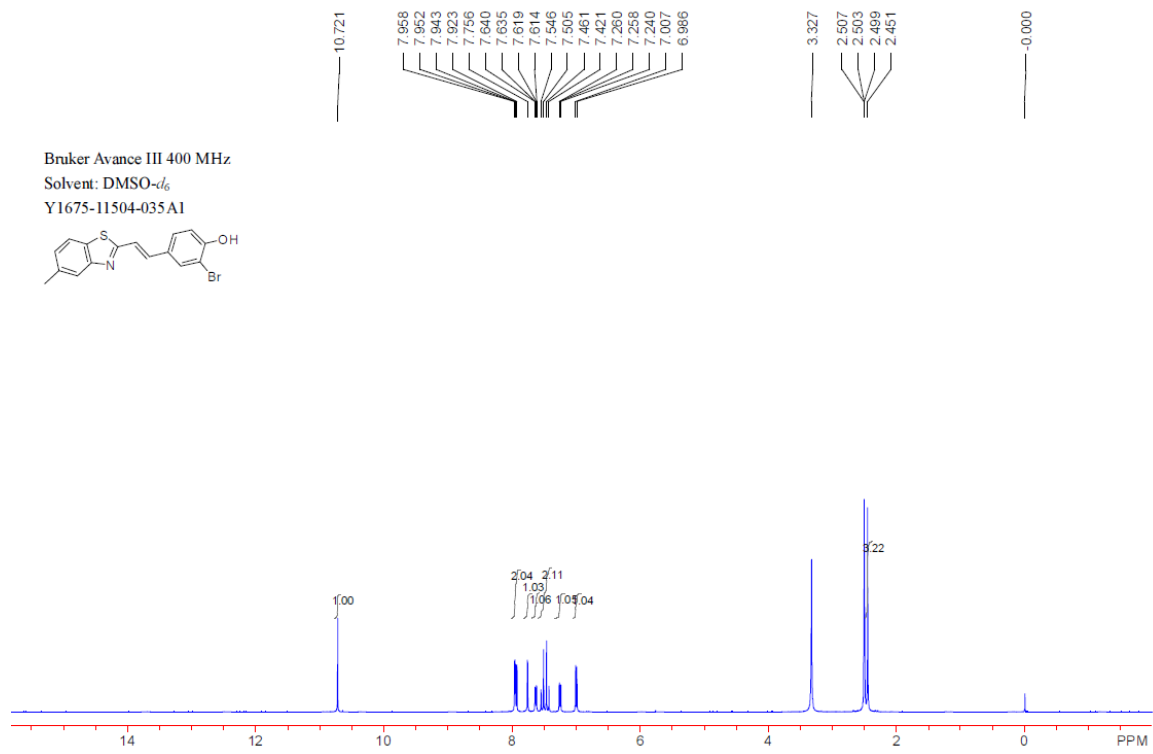

<sup>1</sup>H NMR spectrum of EU02-01B

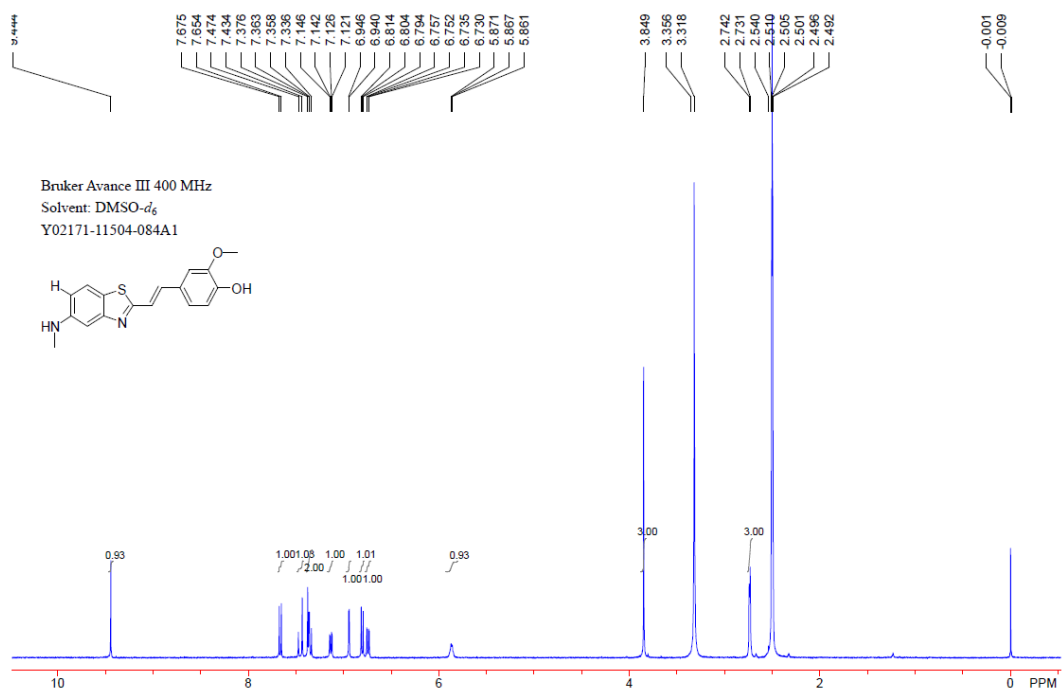

<sup>1</sup>H NMR spectrum of EU03-01A

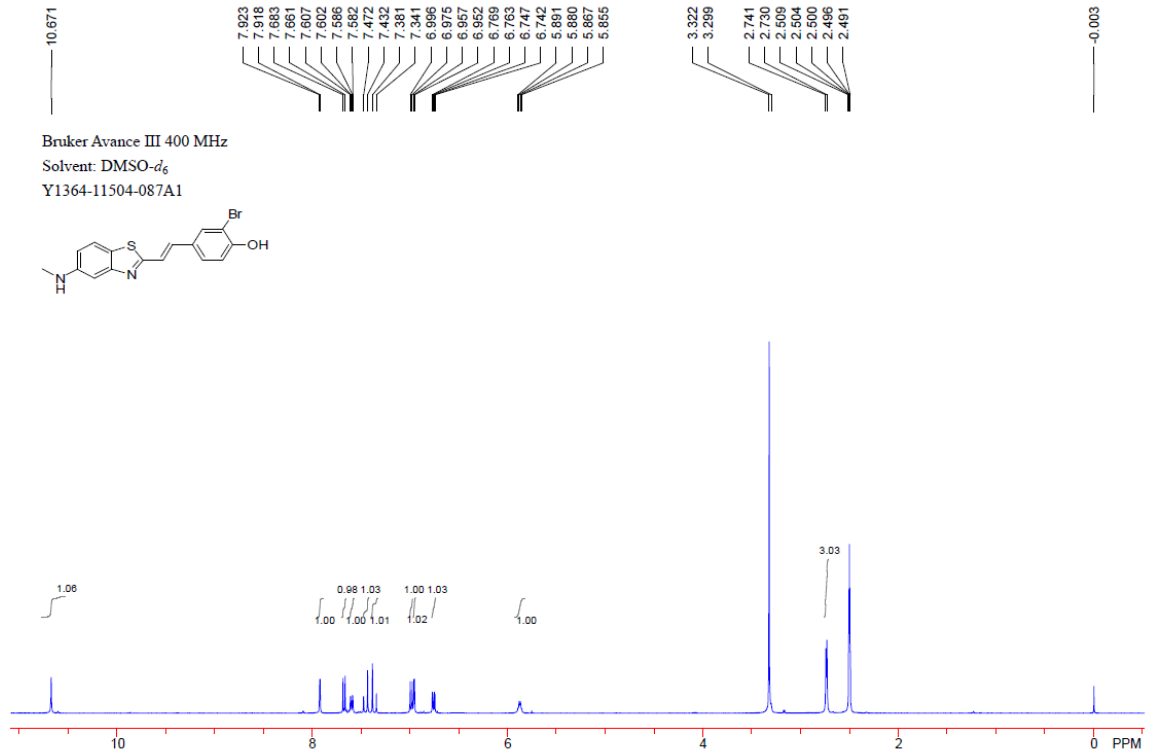

<sup>1</sup>H NMR spectrum of EU03-01B

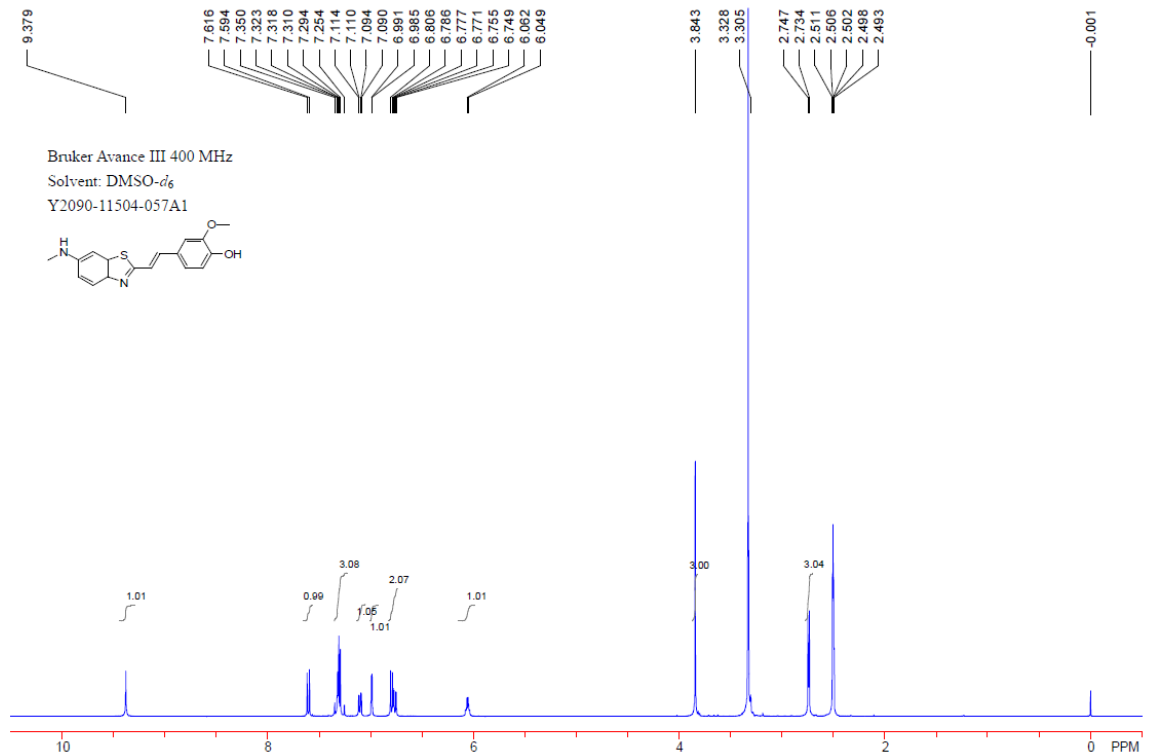

<sup>1</sup>H NMR spectrum of EU04-01A

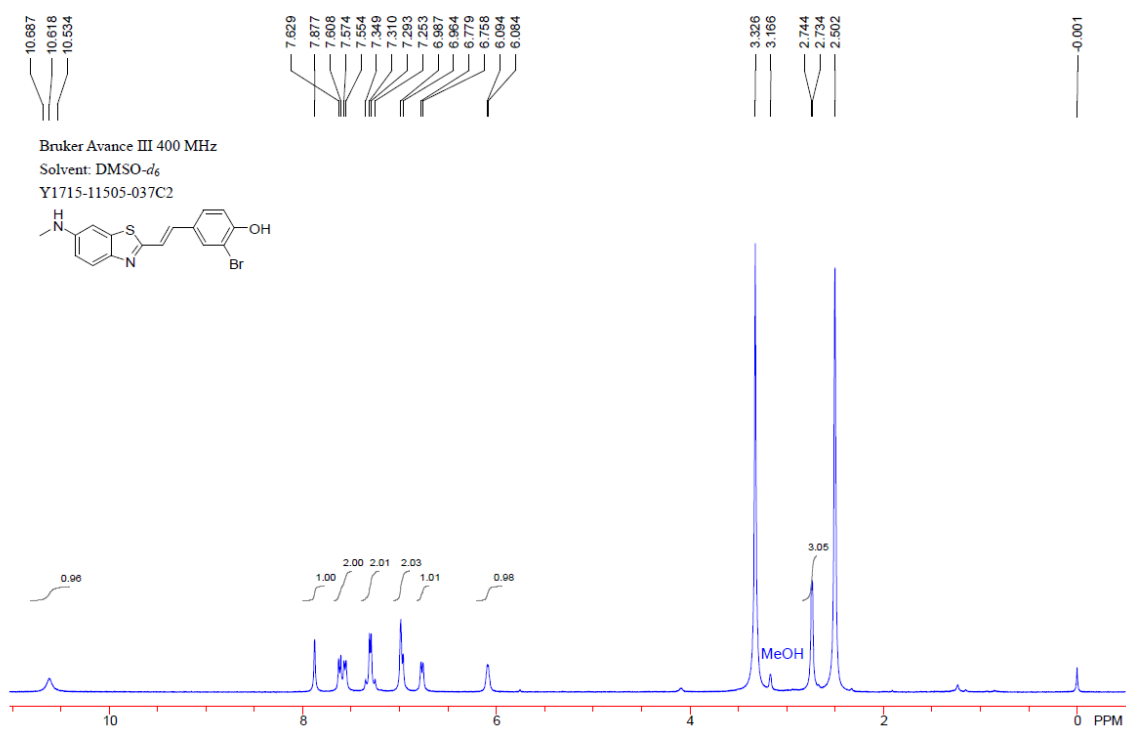

<sup>1</sup>H NMR spectrum of EU04-01B

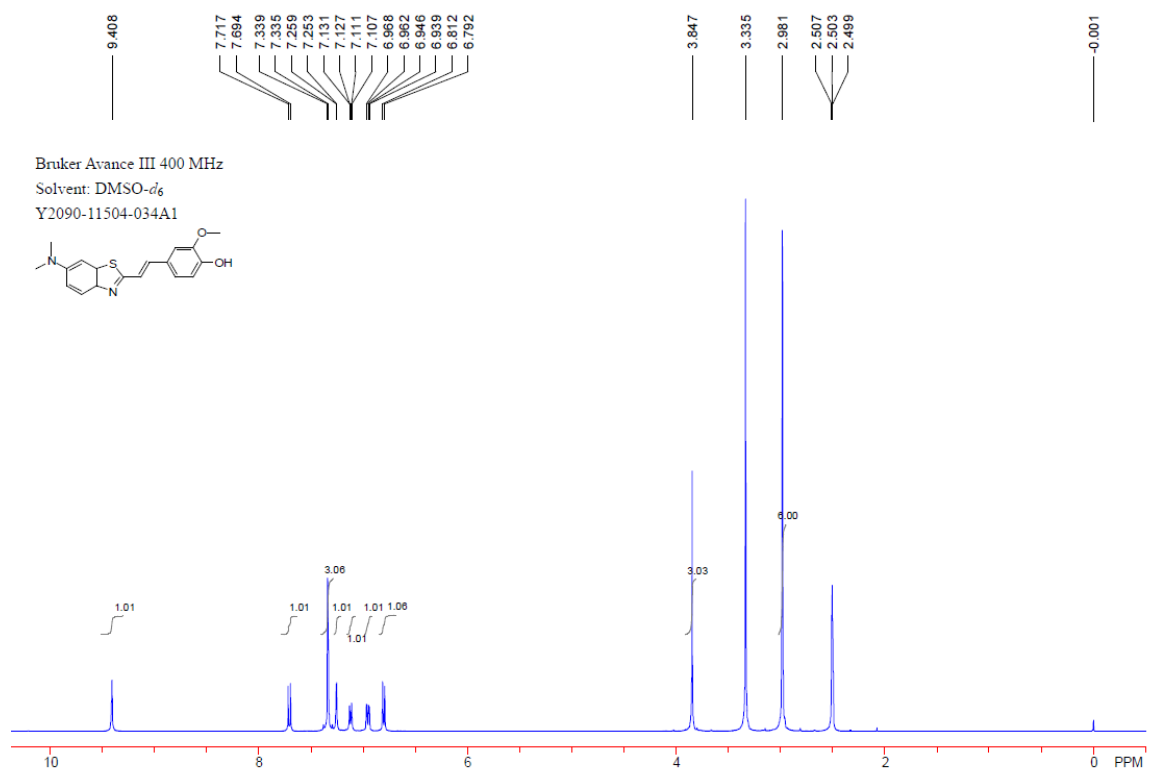

<sup>1</sup>H NMR spectrum of EU04-02A

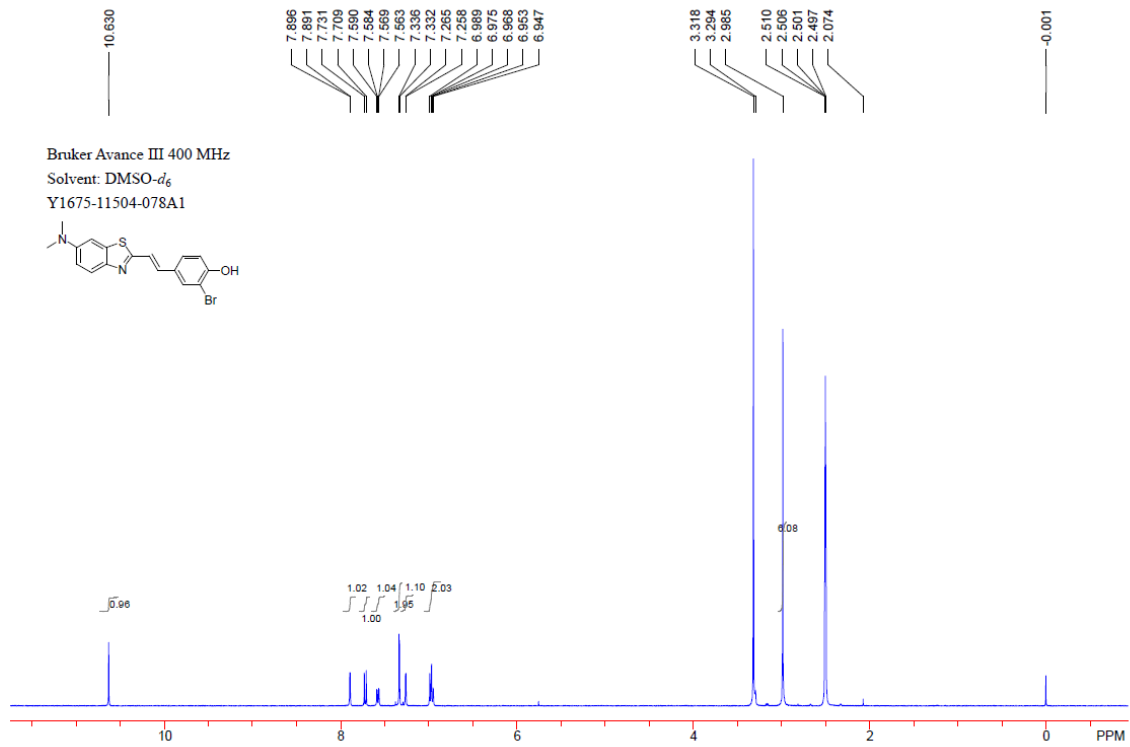

<sup>1</sup>H NMR spectrum of EU04-02B

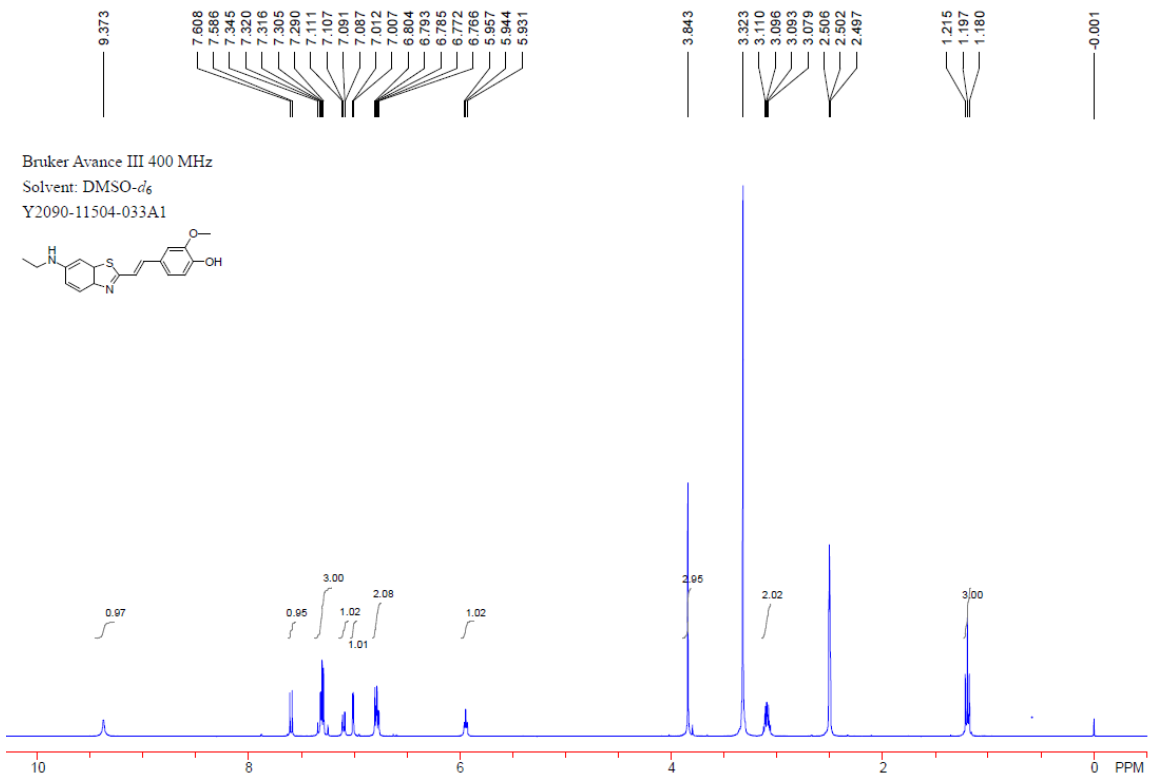

<sup>1</sup>H NMR spectrum of EU04-03A



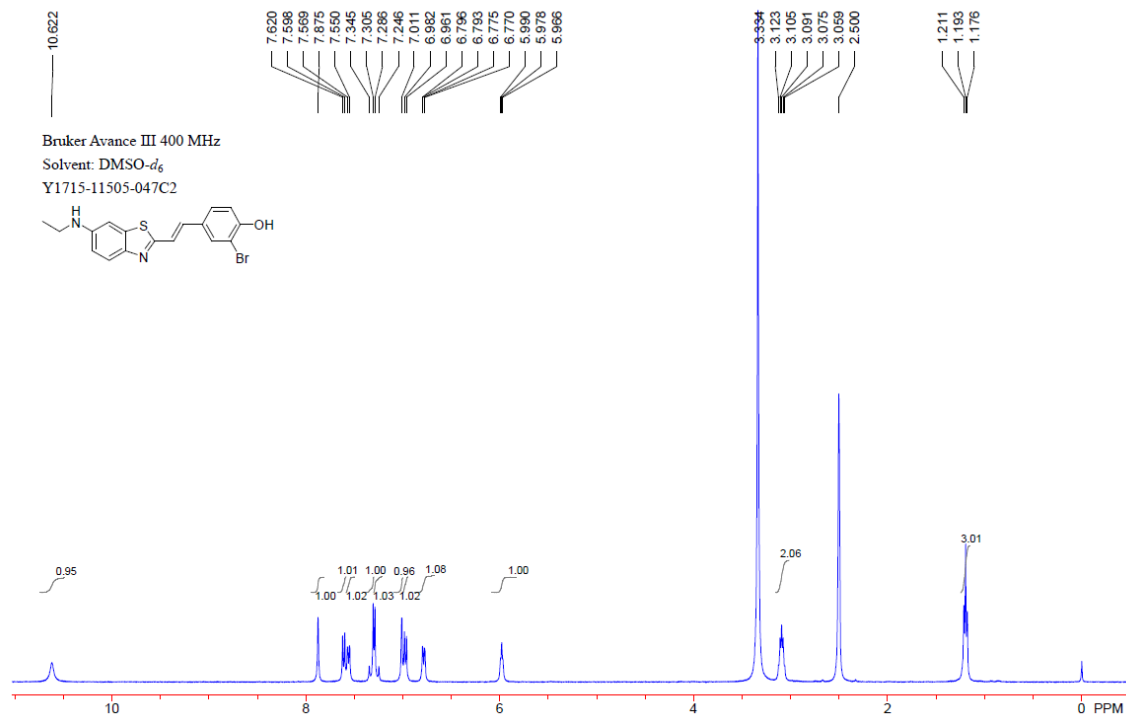

<sup>1</sup>H NMR spectrum of EU04-03B

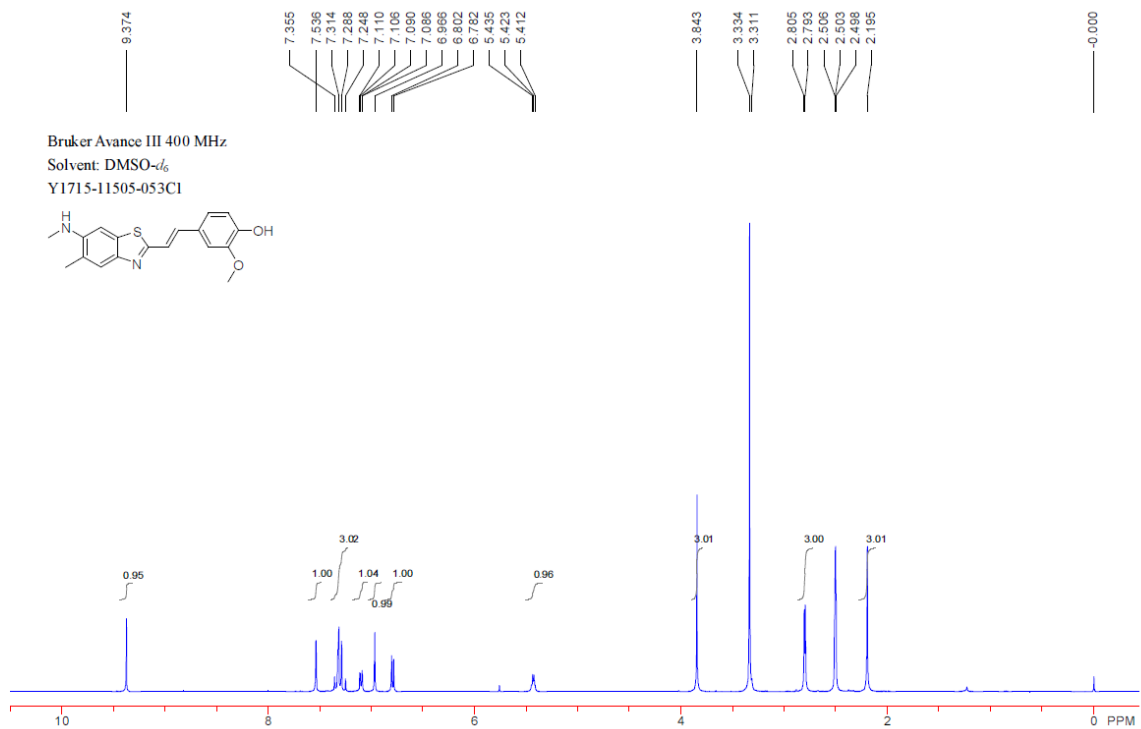

<sup>1</sup>H NMR spectrum of EU05-01A

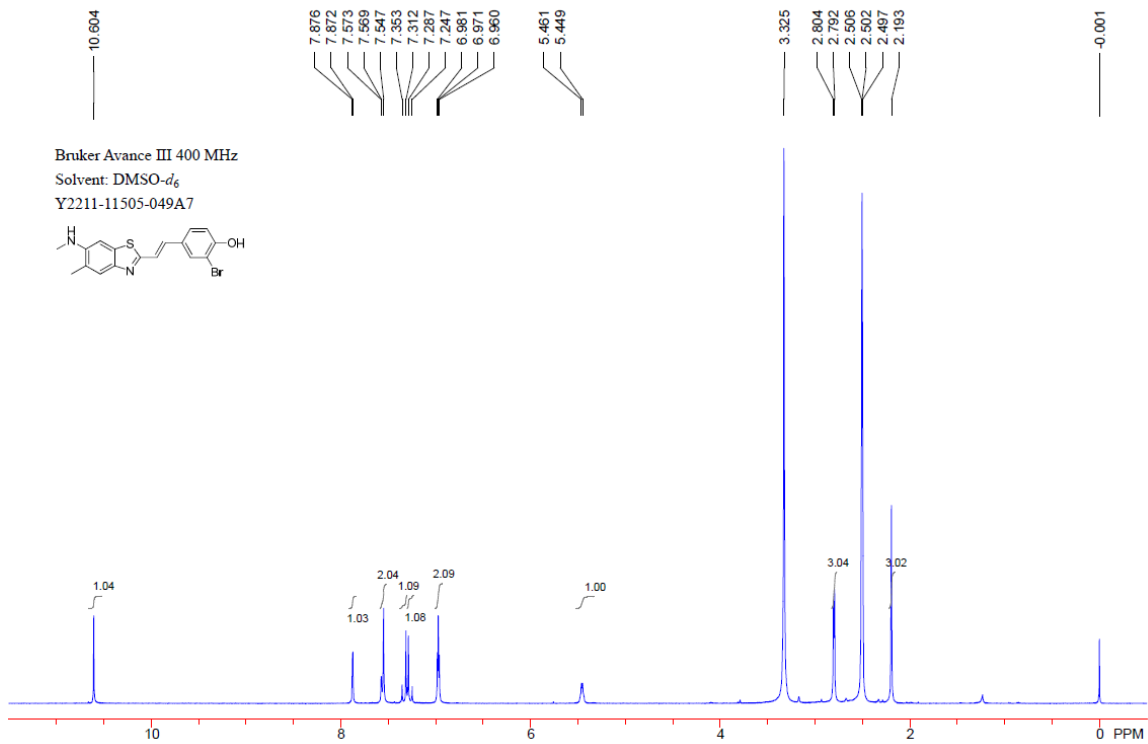

<sup>1</sup>H NMR spectrum of EU05-01B

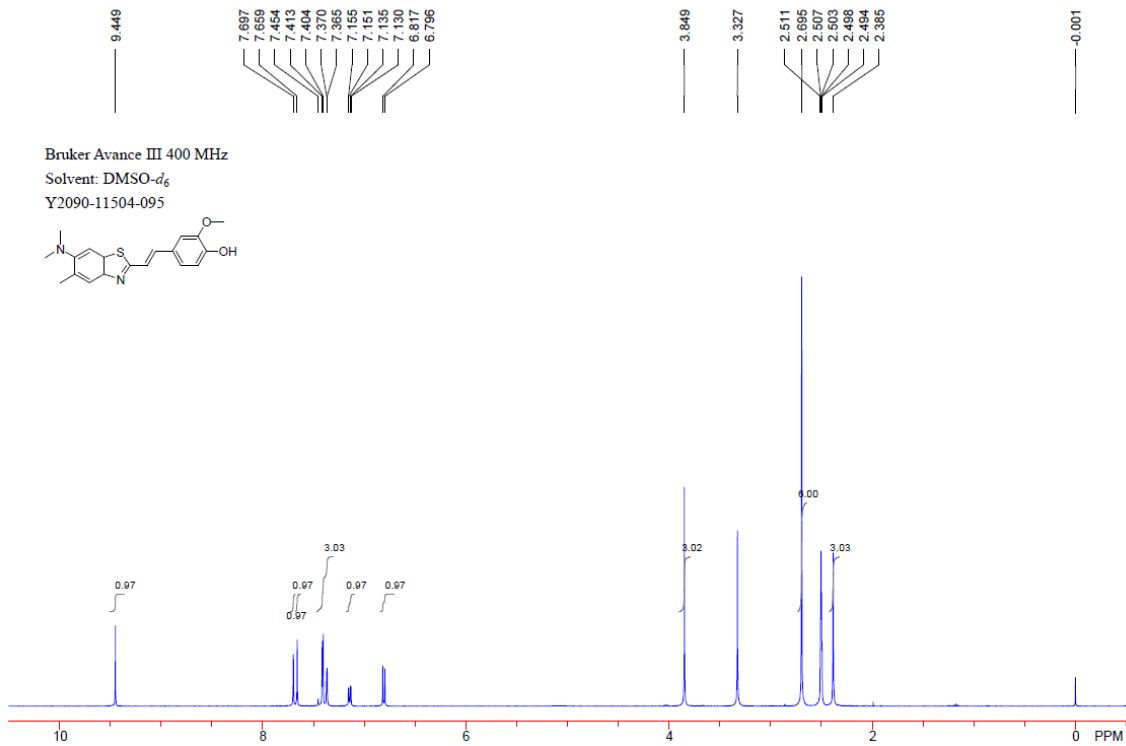

<sup>1</sup>H NMR spectrum of EU05-02A

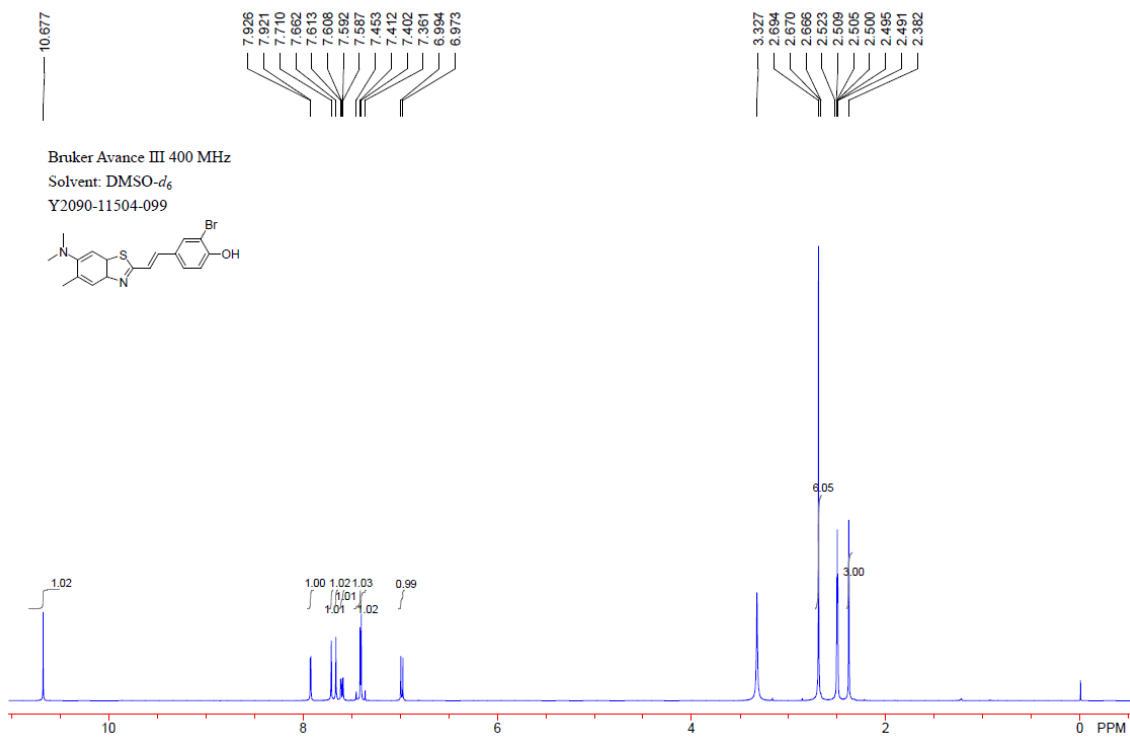

<sup>1</sup>H NMR spectrum of EU05-02B

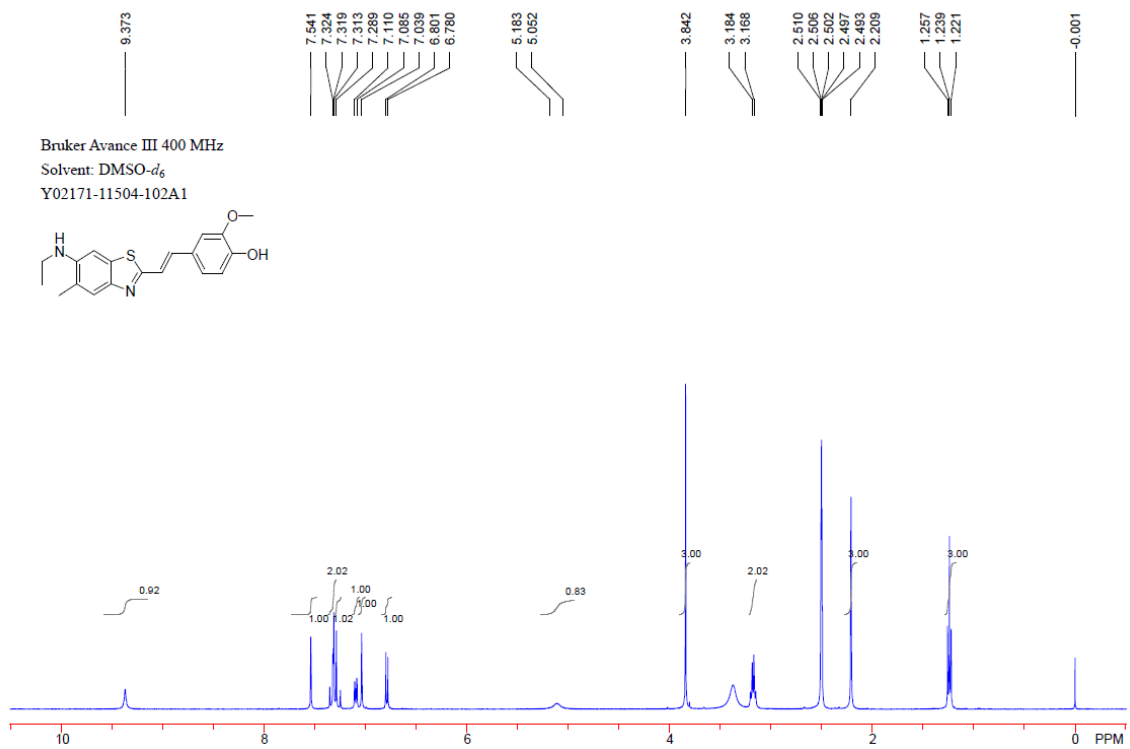

<sup>1</sup>H NMR spectrum of EU05-03A

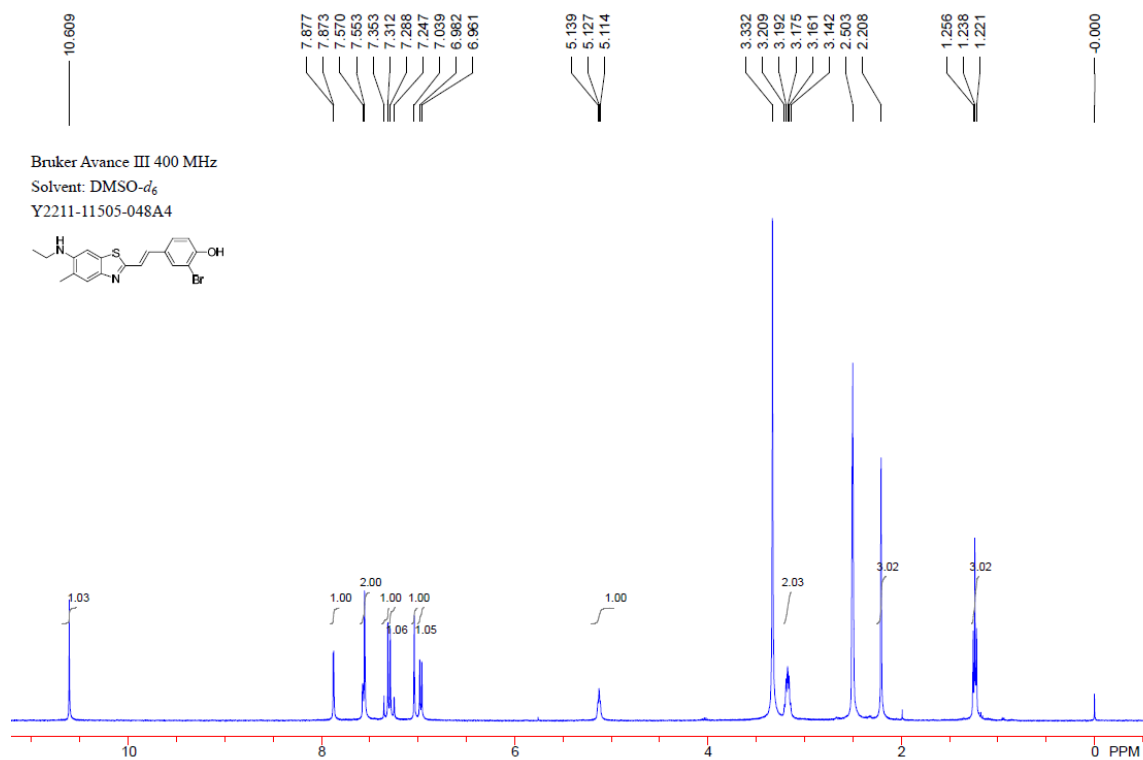

<sup>1</sup>H NMR spectrum of EU05-03B

#### D.) Synthetic routes for F0502B.

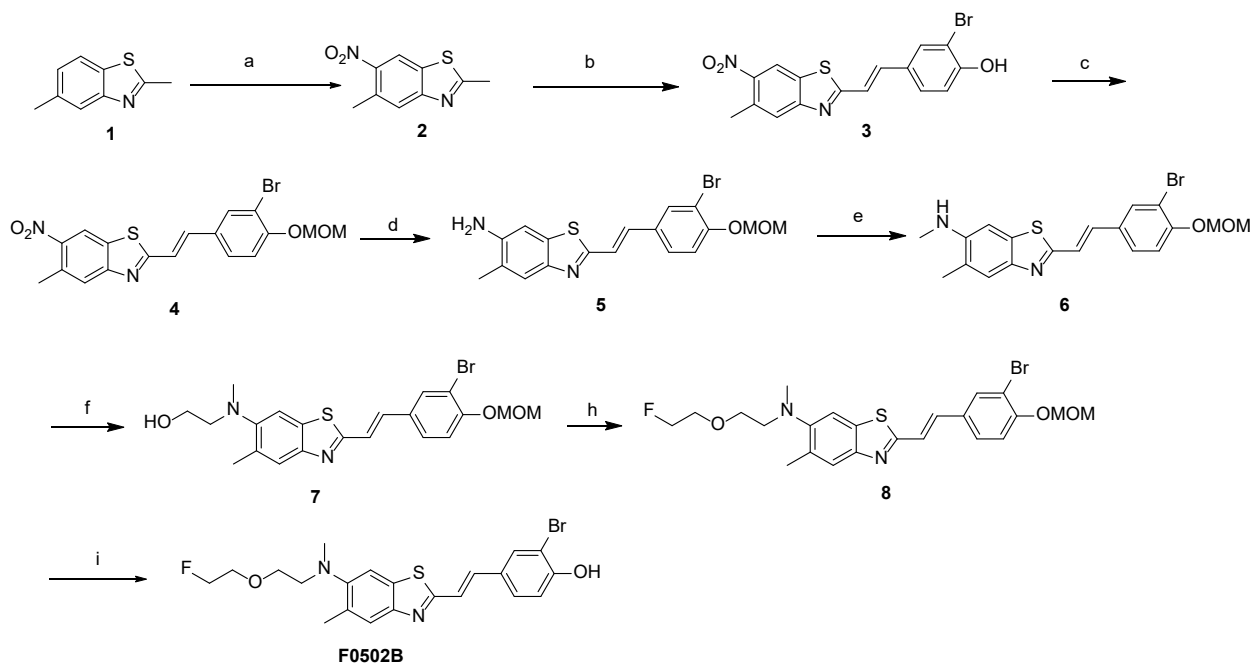

Reagent and conditions: (a) HNO<sub>3</sub>, H<sub>2</sub>SO<sub>4</sub>, 0 °C-rt; (b) 3-bromo-4-hydroxybenzaldehyde, H<sub>2</sub>SO<sub>4</sub>, dioxane, 100 °C; (c) MOMBr, K<sub>2</sub>CO<sub>3</sub>, DMF, 70 °C; (d)

Fe, NH<sub>4</sub>Cl, MeOH, rt; (e) MeI, K<sub>2</sub>CO<sub>3</sub>, DMF, 30 °C; (f) 2-iodoethanol, K<sub>2</sub>CO<sub>3</sub>, DMF, 60 °C; (h) 1-fluoro-2-iodoethane, NaH, DMF, 70 °C; (i) TFA, DCM, 0 °C.

<sup>1</sup>H NMR (400 MHz, DMSO-*d*<sub>6</sub>): δ 10.71 (s, 1H), 7.93 (d, *J* = 2.0 Hz, 1H), 7.73 (d, *J* = 8.4 Hz, 2H), 7.61 (d, *J* = 8.8, 2.4 Hz, 1H), 7.42 (d, *J* = 7.6 Hz, 2H), 6.98 (d, *J* = 8.4 Hz, 1H), 4.55 (dd, *J* = 8.0, 4.0 Hz, 1H), 4.43 (dd, *J* = 8.0, 4.0 Hz, 1H), 3.68-3.57 (m, 4H), 3.11-3.08 (m, 2H), 2.75 (s, 3H), 2.36 (s, 3H). MS (ESI) *m/z* 466.9, 464.9 [M + H]<sup>+</sup>.

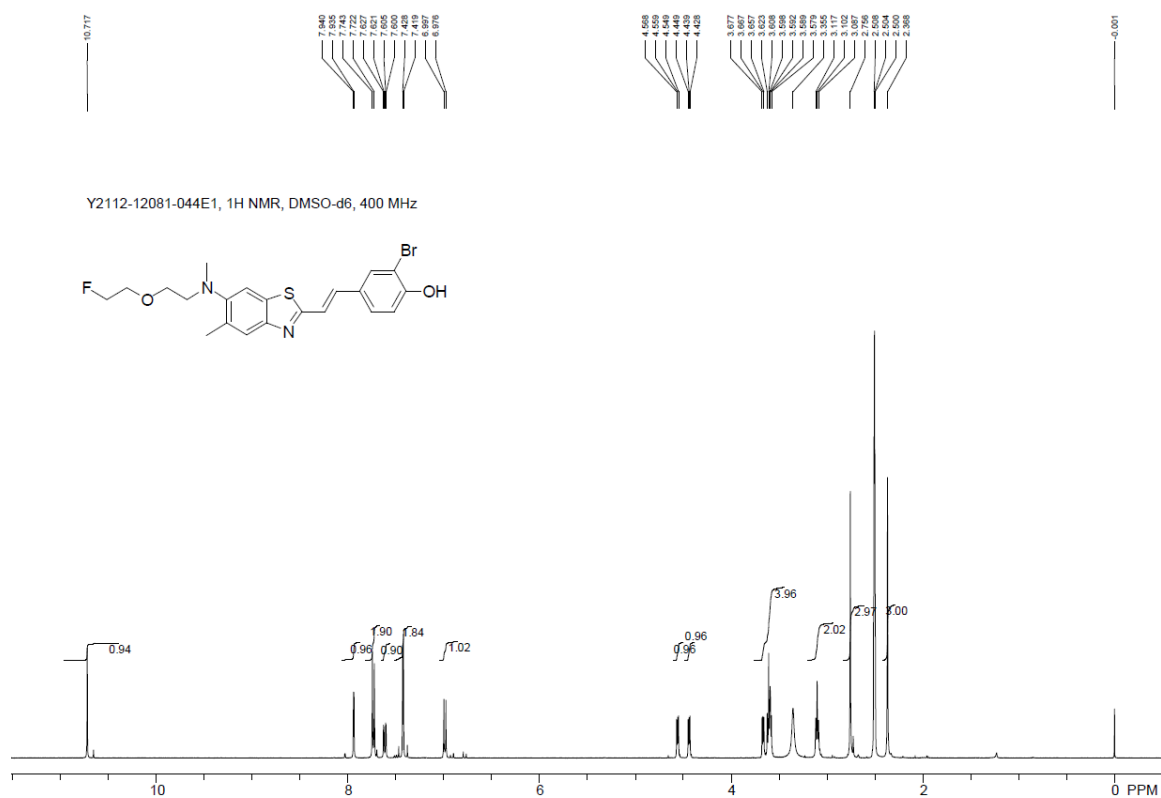

<sup>1</sup>H NMR spectrum of F0502B

**E.)  $^{18}\text{F}$ -labeled synthetic routes for F0502B.**

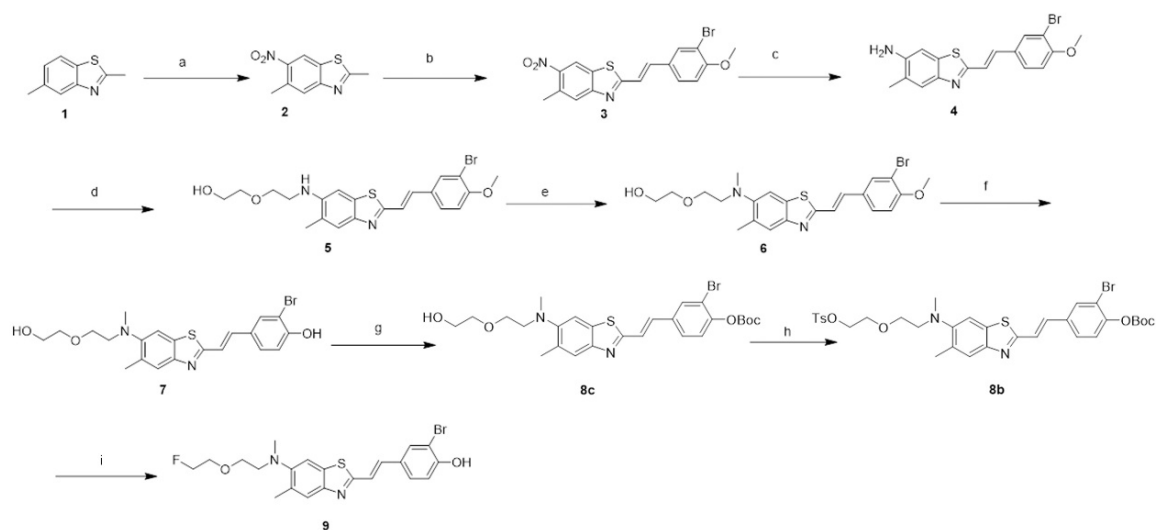

Reagents and conditions: (a)  $\text{HNO}_3$ ,  $\text{H}_2\text{SO}_4$ , 0 °C-rt; (b) 3-bromo-4-methoxybenzaldehyde,  $\text{H}_2\text{SO}_4$ , dioxane, 100 °C; (c) Fe,  $\text{NH}_4\text{Cl}$ , MeOH, 80 °C; (d) 2-(2-iodoethoxy)ethanol,  $\text{K}_2\text{CO}_3$ , DMF, 85 °C; (e) MeI,  $\text{K}_2\text{CO}_3$ , DMF, 30 °C; (f) EtSNa, DMF, 130 °C; (g)  $\text{Boc}_2\text{O}$ , THF, 70 °C; (h) TsCl, Et<sub>3</sub>N, DCM, rt; (i) 1)  $\text{K}^{18}\text{F}$ /Kryptofix 222, DMSO, 110 °C; 2) 3 M HCl, 100 °C; (3) 0.3 M  $\text{NaHCO}_3$ .
